# Supplementary material
Source: MDPI journal article supplement (https://www.mdpi.com/2073-4352/12/12/1774)
Supplement: s1 [file s1]

The additional characterization of the ceramics produced by sintering of polycrystalline detonated nanodiamond ceramics in  $\sim 1000^\circ\text{C}$  and  $1600^\circ\text{C}$ . As can be seen in the S.I. figure 1 there are substantially no new peaks arising with the increasing sintering temperature, proving the conservation of the primary structure of the sample.

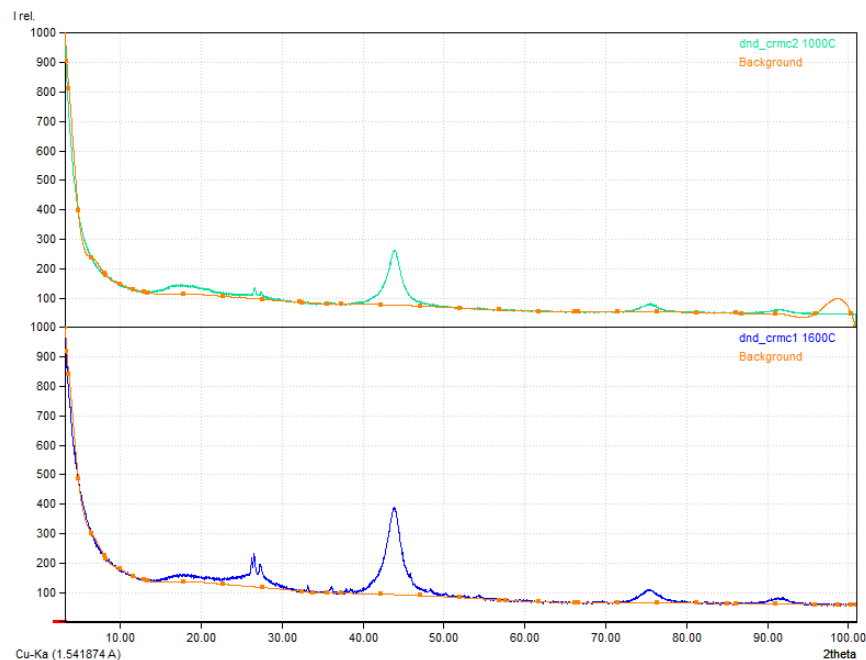

**Figure S1.** XRD patterns of the detonated nanodiamond ceramic samples: top—ceramic sintered at  $1000^\circ\text{C}$  and bottom—ceramic sintered at  $1600^\circ\text{C}$ .
